# Supplementary material for: Health-Related Quality of Life of Tuberculosis Patients during the COVID-19 Pandemic in Conakry, Guinea: A Mixed Methods Study
Source: MDPI journal article supplement (doi:10.3390/tropicalmed7090224), 2022-09-02
Supplement: s1 [file s1]

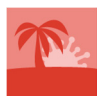

Supplementary Material

**Table S1.** Univariate analysis between dependant variables and the characteristic of the patients.

|                                                  | <b>Stress<br/>p.trend <sup>1</sup></b> | <b>Anxiety<br/>depression<br/>p.trend <sup>1</sup></b> | <b>Pain<br/>Discomfort<br/>p.trend <sup>1</sup></b> | <b>Selfcare<br/>p.trend <sup>1</sup></b> | <b>Usual activities<br/>p.trend <sup>1</sup></b> | <b>Mobility<br/>p.trend <sup>1</sup></b> |
|--------------------------------------------------|----------------------------------------|--------------------------------------------------------|-----------------------------------------------------|------------------------------------------|--------------------------------------------------|------------------------------------------|
| age                                              | 0.256                                  | 0.120                                                  | 0.017                                               | 0.048                                    | <0.001                                           | 0.001                                    |
| Gender                                           | 0.575                                  | 0.926                                                  | 0.865                                               | 0.556                                    | 0.834                                            | 0.846                                    |
| Matrimonial status                               | 0.210                                  | 0.627                                                  | 0.136                                               | 0.137                                    | 0.686                                            | 0.325                                    |
| residence                                        | 0.116                                  | 0.099                                                  | 0.174                                               | 0.381                                    | 0.687                                            | 0.422                                    |
| Education                                        | 0.391                                  | 0.027                                                  | 0.073                                               | 0.963                                    | 0.008                                            | 0.153                                    |
| Occupation                                       | 0.341                                  | 0.885                                                  | 0.333                                               | 0.703                                    | 0.206                                            | 0.638                                    |
| Household num-<br>ber/size                       | <0.001                                 | <0.001                                                 | 0.005                                               | 0.063                                    | 0.069                                            | 0.005                                    |
| Tuberculosis type                                | 0.924                                  | 0.155                                                  | 0.179                                               | 0.183                                    | 0.700                                            | 0.408                                    |
| Disease localisation                             | 0.008                                  | 0.344                                                  | 0.517                                               | 0.322                                    | 0.034                                            | 0.045                                    |
| Treatment history                                | 0.656                                  | 0.347                                                  | 0.449                                               | 0.622                                    | 0.041                                            | 0.148                                    |
| TB diagnostic                                    | 0.005                                  | 0.113                                                  | 0.067                                               | 0.227                                    | 0.072                                            | 0.710                                    |
| Treatment type                                   | 0.852                                  | 0.198                                                  | 0.225                                               | 0.324                                    | 0.861                                            | 0.268                                    |
| Type multi-drug<br>treatment                     | 0.881                                  | 0.267                                                  | 0.072                                               | 0.379                                    | 0.761                                            | 0.326                                    |
| Anti-retroviral<br>treatment                     | 0.056                                  | 0.001                                                  | 0.007                                               | 0.768                                    | 0.063                                            | 0.071                                    |
| Distance site<br>Patient residence               | 0.001                                  | <0.001                                                 | 0.182                                               | 0.025                                    | 0.185                                            | 0.313                                    |
| Length time for drug<br>procurement (in<br>days) | 0.004                                  | <0.001                                                 | 0.129                                               | 0.242                                    | 0.009                                            | 0.004                                    |
| Treatment initiation                             | 0.383                                  | 0.430                                                  | 0.700                                               | 0.991                                    | 0.975                                            | 0.460                                    |
| Duration of treatment                            | 0.381                                  | 0.202                                                  | 0.276                                               | 0.199                                    | 0.019                                            | 0.103                                    |

<sup>1</sup> p trend computed with the levels (no problem, moderate, serious) for each dependent variable.
